# Supplementary material for: Phase transition and ionic conduction enhancement induced by co-doping of LiI and MnI2 in a one-dimensional lead iodide perovskite
Source: Royal Society of Chemistry journal article supplement (doi:10.1039/d3cc02099a), 2023-01-01
Supplement: d3cc02099a1.pdf [file d3cc02099a1.pdf]

## SI

### Phase transition and Ionic conduction enhancement induced by co-doping LiI and MnI<sub>2</sub> in one-dimensional lead iodide perovskite

Ya-Ru Kong,<sup>a</sup> Wei Qiu,<sup>b</sup> Guo-Qin Zhang,<sup>a</sup> Dong-sheng Shao,<sup>a</sup> Zheng-Fang Tian,<sup>b</sup> Hong-Bin Luo,<sup>\*a</sup> Xue-Wei Pan,<sup>a</sup> Jin Zhang,<sup>a</sup> Xiao-Ming Ren<sup>\*a, c, d</sup>

<sup>a</sup> State Key Laboratory of Materials-Oriented Chemical Engineering and College of Chemistry and Molecular Engineering, Nanjing Tech University, Nanjing 211816, P. R. China

<sup>b</sup> Hubei Key Laboratory for Processing and Application of Catalytic Materials, Huanggang Normal University, Huanggang 438000, P. R. China

<sup>c</sup> College of Materials Science and Engineering, Nanjing Tech University, Nanjing 211816, P. R. China

<sup>d</sup> State Key Laboratory of Coordination Chemistry, Nanjing University, Nanjing 210093, P. R. China

Tel: 86-25-58139476

E-mail: [hbluo@njtech.edu.cn](mailto:hbluo@njtech.edu.cn) (HBL); [xmren@njtech.edu.cn](mailto:xmren@njtech.edu.cn) (XMR)

## Content

### Experimental section

Table S1: Microanalysis for C, H and N elements and EDS for Pb and Mn elements in each hybrid

Table S2: XPS binding energies in each hybrid and references

Fig. S1: Optical pictures of samples with  $x = 0-0.14$ .

Fig. S2: SEM image and EDS of  $\text{Bu}_4\text{N}_{1-x}\text{Li}_x\text{Mn}_x\text{Pb}_{1-x}\text{I}_3$  ( $x = 0$ ). (a) Image, (b) element overlay, (c) C, (d) N, (e) I and (f) Pb elements.

Fig. S3: SEM image and EDS of  $\text{Bu}_4\text{N}_{1-x}\text{Li}_x\text{Mn}_x\text{Pb}_{1-x}\text{I}_3$  ( $x = 0.011$ ). (a) Image, (b) element overlay, (c) C, (d) N, (e) I, (f) Mn and (g) Pb elements.

Fig. S4: SEM image and EDS of  $\text{Bu}_4\text{N}_{1-x}\text{Li}_x\text{Mn}_x\text{Pb}_{1-x}\text{I}_3$  ( $x = 0.042$ ). (a) Image, (b) element overlay, (c) C, (d) N, (e) I, (f) Mn and (g) Pb elements.

Fig. S5: SEM image and EDS of  $\text{Bu}_4\text{N}_{1-x}\text{Li}_x\text{Mn}_x\text{Pb}_{1-x}\text{I}_3$  ( $x = 0.11$ ). (a) Image, (b) element overlay, (c) C, (d) N, (e) I, (f) Mn and (g) Pb elements.

Fig. S6: SEM image and EDS of  $\text{Bu}_4\text{N}_{1-x}\text{Li}_x\text{Mn}_x\text{Pb}_{1-x}\text{I}_3$  ( $x = 0.14$ ). (a) Image, (b) element overlay, (c) C, (d) N, (e) I, (f) Mn and (g) Pb elements.

Fig. S7: Experimental and simulated PXRD patterns of  $[\text{Bu}_4\text{N}]\text{PbI}_3$ , and the simulated PXRD pattern was obtained from single crystal diffraction data of  $[\text{Bu}_4\text{N}]\text{PbI}_3$ .

Fig. S8: TG plots of  $\text{Bu}_4\text{N}_{1-x}\text{Li}_x\text{Mn}_x\text{Pb}_{1-x}\text{I}_3$  ( $x = 0-0.14$ ).

Fig. S9: IR spectra of  $\text{Bu}_4\text{N}_{1-x}\text{Li}_x\text{Mn}_x\text{Pb}_{1-x}\text{I}_3$  ( $x = 0-0.14$ ).

Fig. S10: Experimental and simulated EPR spectra of  $\text{Bu}_4\text{N}_{1-x}\text{Li}_x\text{Mn}_x\text{Pb}_{1-x}\text{I}_3$  ( $x = 0.011-0.14$ ) with  $g$  value  $\approx 2.0$  and average  $A$  value  $\sim 110$  Gauss.

Fig. S11: DSC Plots of with  $x =$  (a) 0, (b, c) 0.011, (d) 0.042, (e) 0.11, (f) 0.14 with four heating and cooling cycles. (g) Variable-temperature PXRD patterns of  $\text{Bu}_4\text{N}_{1-x}\text{Li}_x\text{Mn}_x\text{Pb}_{1-x}\text{I}_3$  with  $x = 0.14$ .

Fig. S12: Plots of dielectric permittivity *versus* temperature at the selected frequencies for  $\text{Bu}_4\text{N}_{1-x}\text{Li}_x\text{Mn}_x\text{Pb}_{1-x}\text{I}_3$  with  $x =$  (a) 0, (b) 0.011, (c) 0.042 and (d) 0.11. (e) Resistance plots and (f) Arrhenius plots of  $\text{Bu}_4\text{N}_{1-x}\text{Li}_x\text{Mn}_x\text{Pb}_{1-x}\text{I}_3$  ( $x = 0-0.14$ ) at 273–373K.

Fig. S13: Plots of (a, b) chronoamperometry of  $\text{Bu}_4\text{N}_{1-x}\text{Li}_x\text{Mn}_x\text{Pb}_{1-x}\text{I}_3$  with  $x = 0-0.14$ . (c) Transference numbers of ion vs. temperature for  $\text{Bu}_4\text{N}_{1-x}\text{Li}_x\text{Mn}_x\text{Pb}_{1-x}\text{I}_3$  with  $x = 0.14$ . (d) solid ultraviolet-visible near-IR spectra of  $\text{Bu}_4\text{N}_{1-x}\text{Li}_x\text{Mn}_x\text{Pb}_{1-x}\text{I}_3$  with  $x = 0-0.14$ .

### References

## Experimental section

### Chemicals and Materials

All of chemicals and solvents were purchased from commercial suppliers and used without further purification.  $[\text{Bu}_4\text{N}]\text{PbI}_3$  ( $\text{Bu}_4\text{N}^+$  = tetrabutylammonium) was prepared following the procedure in literature.<sup>1</sup>

### Preparation of co-doped $\text{Mn}^{2+}$ and $\text{Li}^+$ samples

The co-doped samples  $\text{Bu}_4\text{N}_{1-x}\text{Li}_x\text{Mn}_x\text{Pb}_{1-x}\text{I}_3$  were mechanochemically prepared using a similar procedure. The  $x$  value was determined by ICP technique, and the five hybrids are labeled as  $\text{Bu}_4\text{N}_{1-x}\text{Li}_x\text{Mn}_x\text{Pb}_{1-x}\text{I}_3$  ( $x = 0, 0.011, 0.042, 0.11$  and  $0.14$ ). Each sample was also characterized by EDS and microanalysis for C, H and N elements, and these results are summarized in Table S1.

### Characterization

Elemental analyses (C, H, N) were performed with an Elementar Vario EL. Inductively coupled plasma-mass spectrometry (ICP-MS) analyses were performed by a PHI 5000 Versa Probe ICP spectrometer. EDS was carried out by means of a Hitachi S-3400N scanning electron microscope. Thermogravimetric (TG) measurements were performed with a SDT Q600 thermogravimetric analyzer in 300–1073 K under  $\text{N}_2$  atmosphere, and the heating rate is  $20 \text{ K min}^{-1}$ . DSC measurements were performed on a NETZSCH DSC 204F1 Phoenix with a temperature change rate of  $10 \text{ K min}^{-1}$ . Raman spectra was conducted on a Thermo Fisher Scientific DXR2 instrument with a 532 nm laser light irradiation from 26–3500  $\text{cm}^{-1}$ . Fourier transform infrared (FT-IR) spectrum was recorded on a Thermo Scientific Nicolet iS10 spectrophotometer in the regime of 4000–400  $\text{cm}^{-1}$ . X-band EPR spectra were obtained using Bruker EMX Electron Spin Resonance system at ambient condition. X-ray photoelectron spectroscopy (XPS) equipped with a standard and monochromatic Al  $\text{K}_\alpha$  X-ray source (Thermo Fisher Nexsa) operated at 72 W (12 kV, 6 mA) was employed for surface analysis, and the binding energies were referenced to the internal standard C 1s main peak at 285.0 eV.

Powder X-ray diffraction (PXRD) data were collected on a MiniFlex600 powder diffractometer at ambient temperature, and the measurement was operated at 40 kV and

40 mA, and using Cu K $\alpha$  radiation ( $\lambda = 1.5404 \text{ \AA}$ ). Temperature dependent PXRD patterns were recorded by Bruker D8 ADVANCE instrument equipped with an xrk900 sample cell.

Dielectric permittivity and impedance spectra were recorded by a concept 80 system (Novocontrol, Germany) in 273–373 K, and the frequencies span from 1 to  $10^7$  Hz. The chronoamperometry was recorded by a Gamry Reference 600+ electrochemical workstation in 318–373 K. All of samples were prepared in the form of a disk with the diameter of 7 mm and the thickness of ca. 1.4 mm.

Table S1: Microanalysis for C, H and N elements and EDS for Pb and Mn elements in each hybrid

| <b>Bu<sub>4</sub>N<sub>1-x</sub>Li<sub>x</sub>Mn<sub>x</sub>Pb<sub>1-x</sub>I<sub>3</sub></b> | <b>Micro analysis/found(calc.)</b> |                |                | <b>EDS mapping results</b> |                |                                |
|-----------------------------------------------------------------------------------------------|------------------------------------|----------------|----------------|----------------------------|----------------|--------------------------------|
|                                                                                               | <b>C / %</b>                       | <b>H / %</b>   | <b>N / %</b>   | <b>Pb/at.%</b>             | <b>Mn/at.%</b> | <b>Mn/Pb<br/>(found/calc.)</b> |
| x = 0                                                                                         | 23.09<br>(23.14)                   | 4.30<br>(4.37) | 1.58<br>(1.69) | NA                         | NA             | NA                             |
| x = 0.011                                                                                     | 22.35<br>(23.01)                   | 4.19<br>(4.34) | 1.46<br>(1.68) | 1.91                       | 0.06           | 0.031<br>(0.010)               |
| x = 0.042                                                                                     | 22.00<br>(22.61)                   | 4.05<br>(4.27) | 1.48<br>(1.65) | 4.22                       | 0.21           | 0.049<br>(0.053)               |
| x = 0.11                                                                                      | 21.08<br>(21.71)                   | 3.98<br>(4.10) | 1.40<br>(1.58) | 3.19                       | 0.38           | 0.119<br>(0.11)                |
| x = 0.14                                                                                      | 20.78<br>(21.32)                   | 3.94<br>(4.03) | 1.40<br>(1.55) | 2.56                       | 0.45           | 0.176<br>(0.17)                |

Table S2: XPS binding energies in each hybrid and references

| Element | E <sub>b</sub> / eV        |                            |                            |                            |                            | Ref. |
|---------|----------------------------|----------------------------|----------------------------|----------------------------|----------------------------|------|
|         | x = 0                      | x = 0.011                  | x = 0.042                  | x = 0.11                   | x = 0.14                   |      |
| Pb 4f   | 141.83(4f <sub>5/2</sub> ) | 142.12(4f <sub>5/2</sub> ) | 142.00(4f <sub>5/2</sub> ) | 141.94(4f <sub>5/2</sub> ) | 141.87(4f <sub>5/2</sub> ) | 2    |
|         | 136.27(4f <sub>7/2</sub> ) | 137.21(4f <sub>7/2</sub> ) | 137.11(4f <sub>7/2</sub> ) | 137.02(4f <sub>7/2</sub> ) | 137.05(4f <sub>7/2</sub> ) |      |
| I 3d    | 629.08(3d <sub>3/2</sub> ) | 629.40(3d <sub>3/2</sub> ) | 629.30(3d <sub>3/2</sub> ) | 629.29(3d <sub>3/2</sub> ) | 629.17(3d <sub>3/2</sub> ) | 2    |
|         | 617.63(3d <sub>5/2</sub> ) | 617.98(3d <sub>5/2</sub> ) | 617.82(3d <sub>5/2</sub> ) | 617.74(3d <sub>5/2</sub> ) | 617.76(3d <sub>5/2</sub> ) |      |
| N 1s    | 400.74                     | 401.25                     | 401.30                     | 401.17                     | 401.23                     | 3    |
| C 1s    | 283.99                     | 284.32                     | 284.20                     | 284.13                     | 284.83                     | 4    |

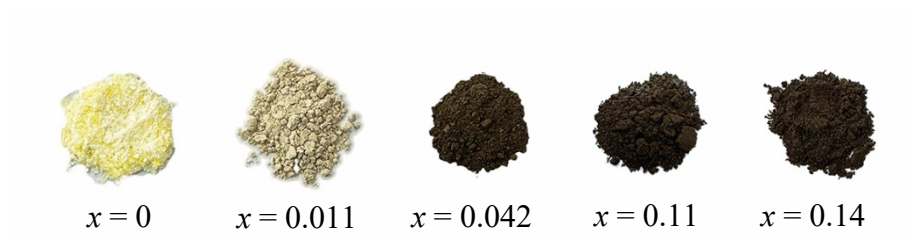

Fig. S1: Optical pictures of samples with  $x = 0$ – $0.14$ .

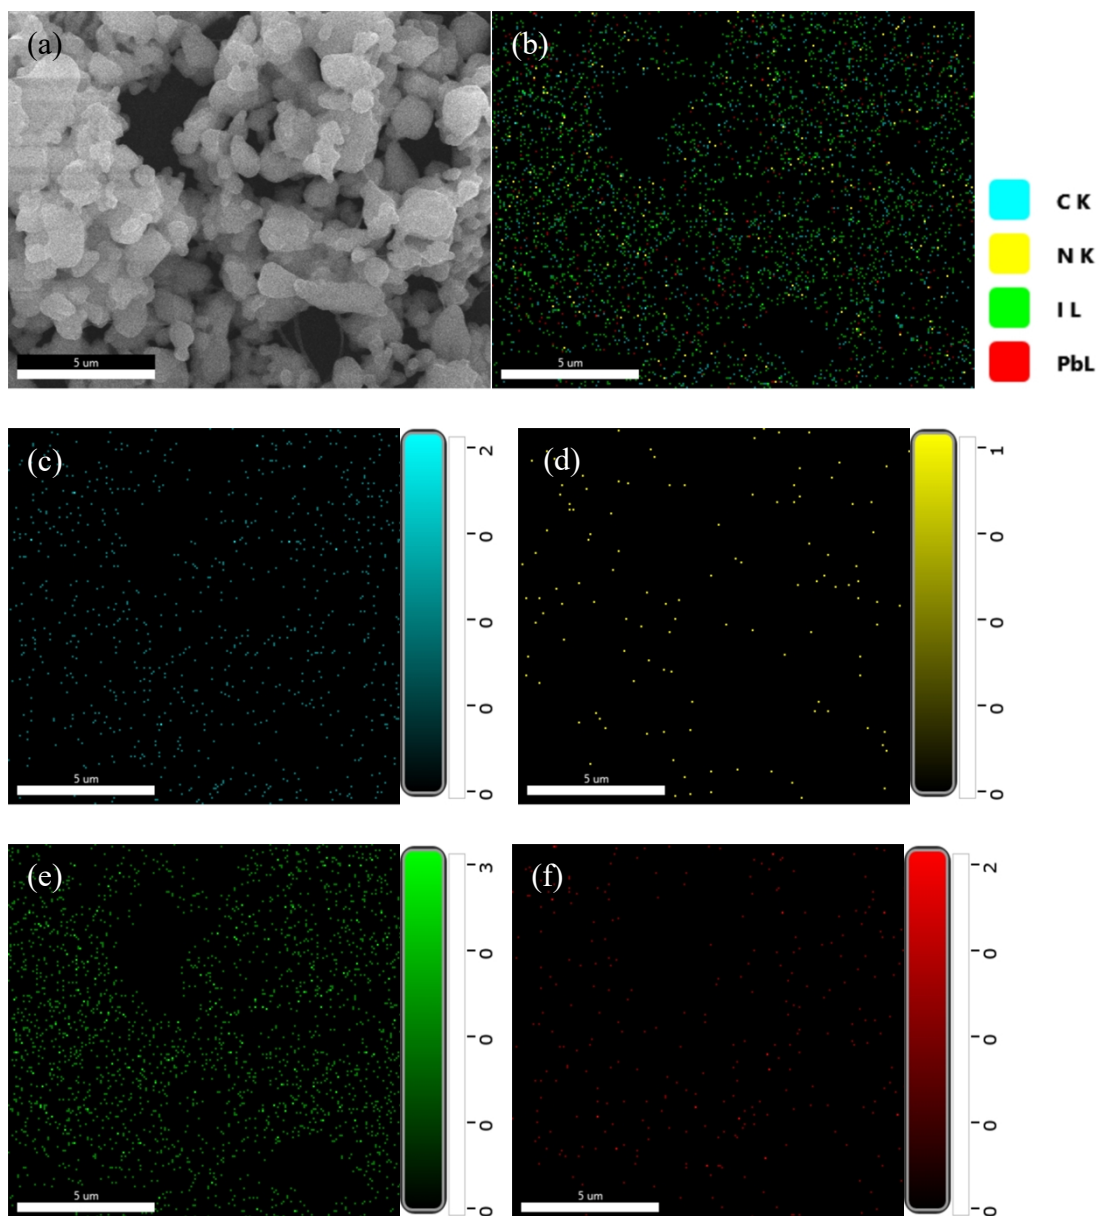

Fig. S2: SEM image and EDS of  $\text{Bu}_4\text{N}_{1-x}\text{Li}_x\text{Mn}_x\text{Pb}_{1-x}\text{I}_3$  ( $x = 0$ ). (a) Image, (b) element overlay, (c) C, (d) N, (e) I and (f) Pb elements.

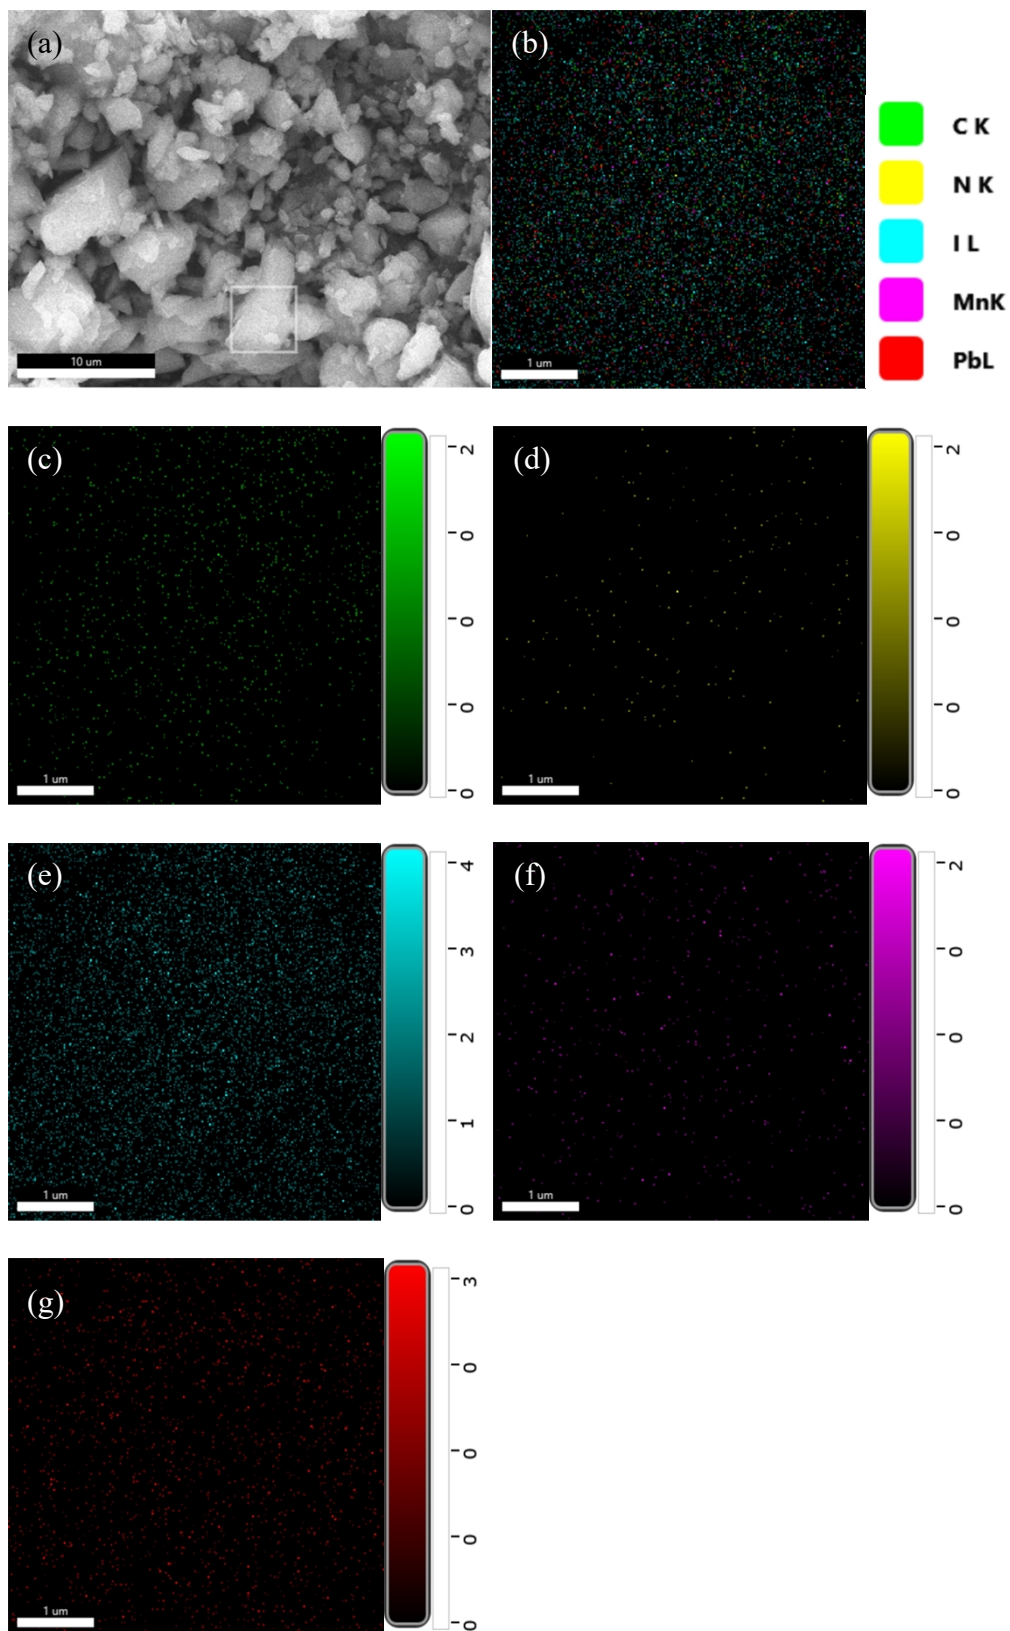

Fig. S3: SEM image and EDS of  $\text{Bu}_4\text{N}_{1-x}\text{Li}_x\text{Mn}_x\text{Pb}_{1-x}\text{I}_3$  ( $x = 0.011$ ). (a) Image, (b) element overlay, (c) C, (d) N, (e) I, (f) Mn and (g) Pb elements.

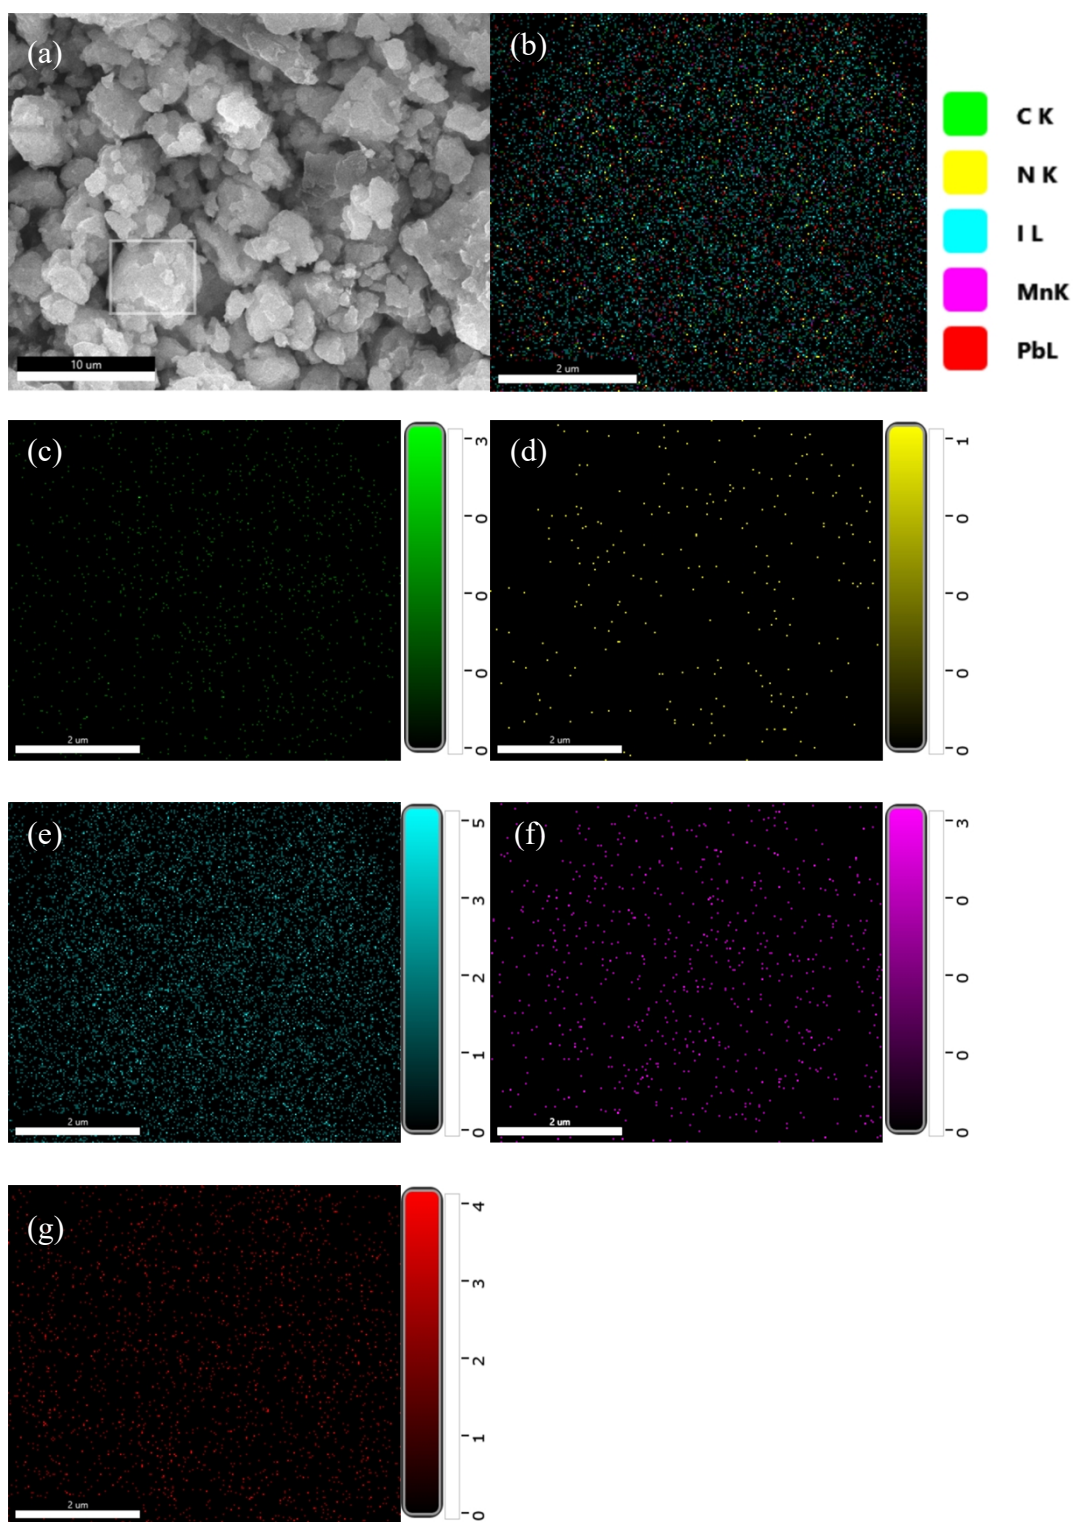

Fig. S4: SEM image and EDS of  $\text{Bu}_4\text{N}_{1-x}\text{Li}_x\text{Mn}_x\text{Pb}_{1-x}\text{I}_3$  ( $x = 0.042$ ). (a) Image, (b) element overlay, (c) C, (d) N, (e) I, (f) Mn and (g) Pb elements.



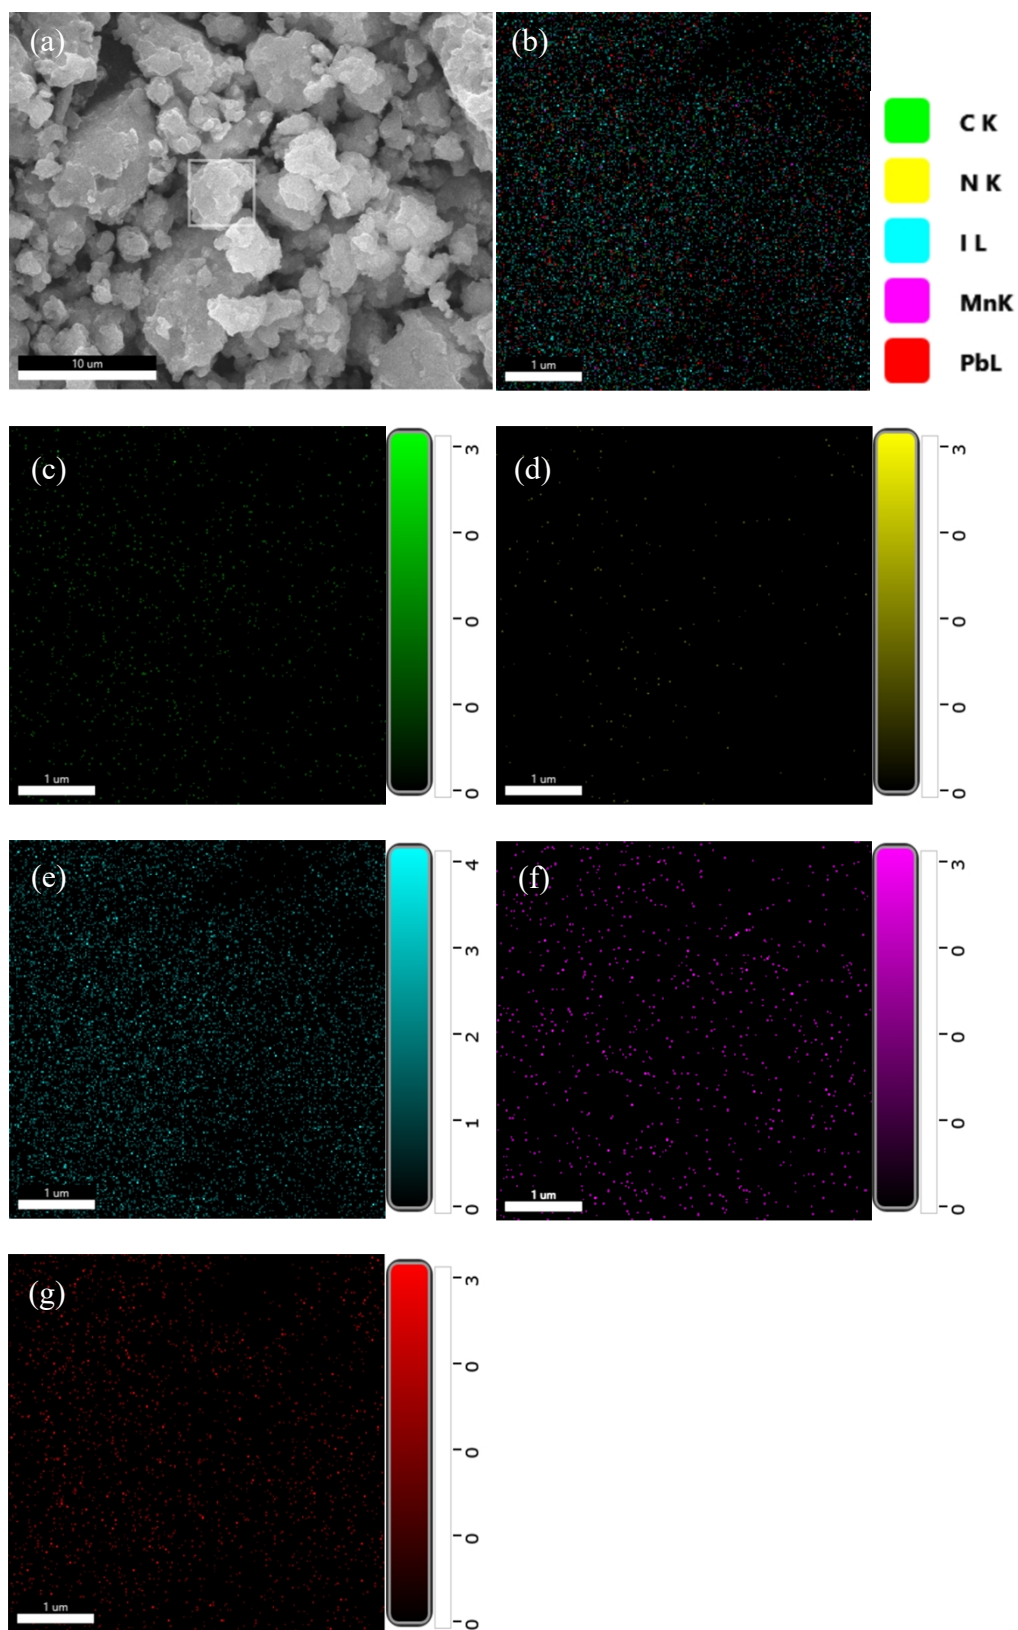

Fig. S5: SEM image and EDS of  $\text{Bu}_4\text{N}_{1-x}\text{Li}_x\text{Mn}_x\text{Pb}_{1-x}\text{I}_3$  ( $x = 0.11$ ). (a) Image, (b) element overlay, (c) C, (d) N, (e) I, (f) Mn and (g) Pb elements.



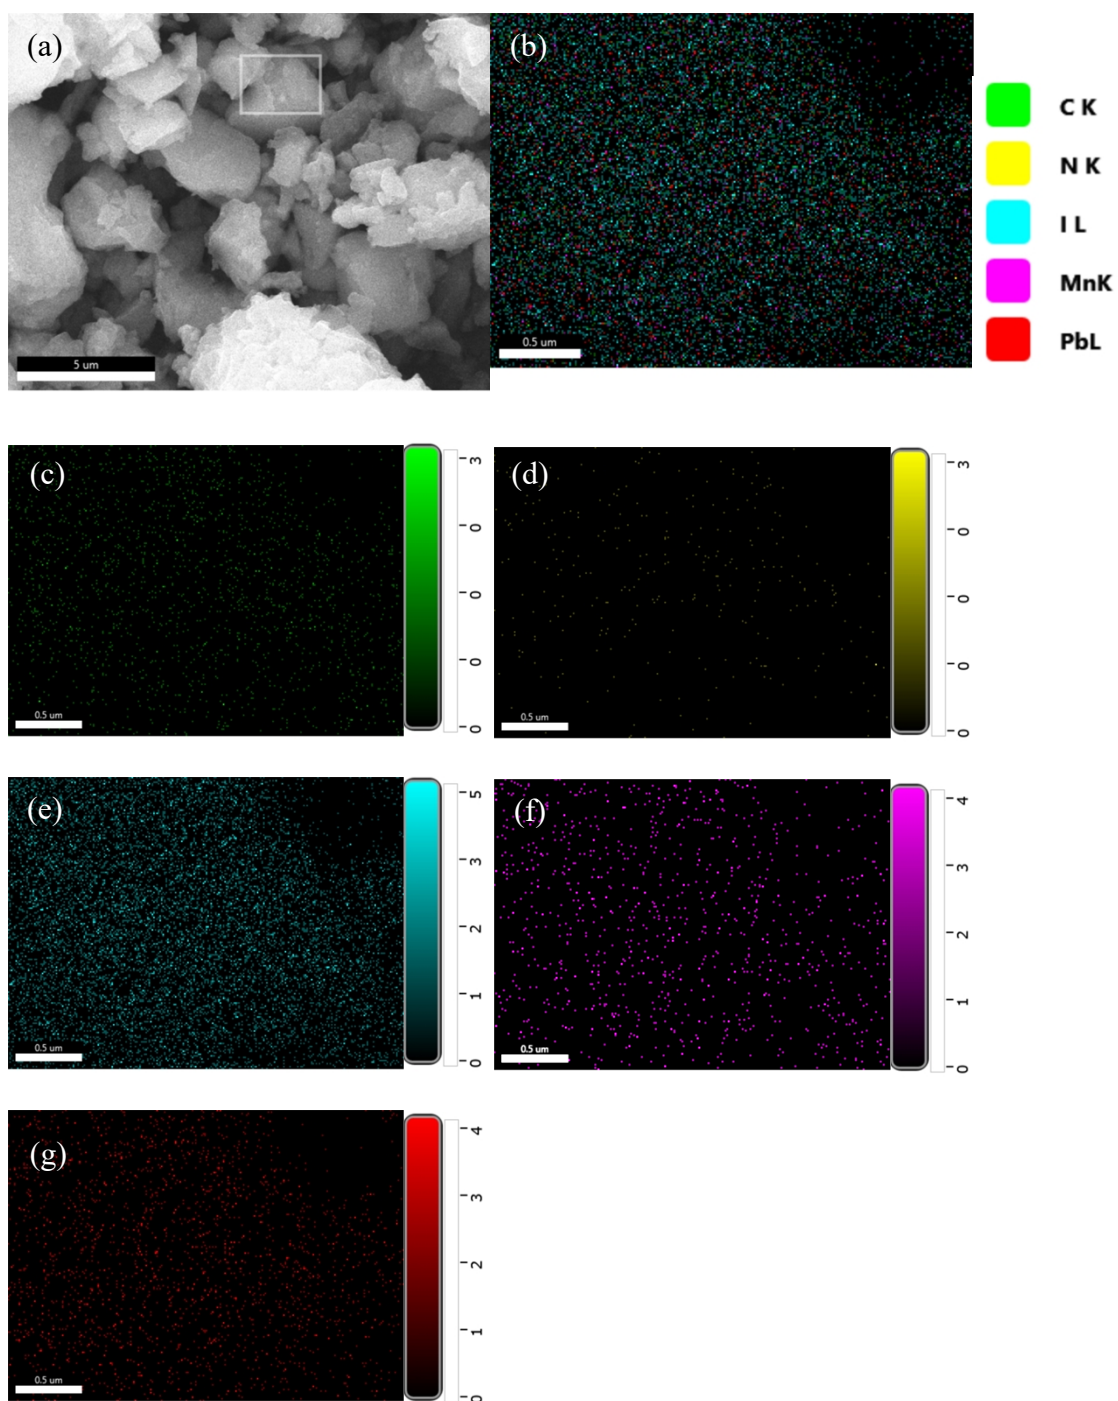

Fig. S6: SEM image and EDS of  $\text{Bu}_4\text{N}_{1-x}\text{Li}_x\text{Mn}_x\text{Pb}_{1-x}\text{I}_3$  ( $x = 0.14$ ). (a) Image, (b) element overlay, (c) C, (d) N, (e) I, (f) Mn and (g) Pb elements.

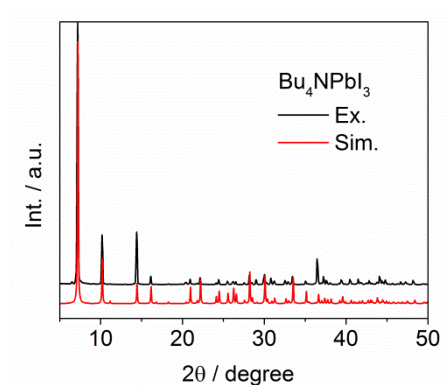

Fig. S7: Experimental and simulated PXRD patterns of  $[\text{Bu}_4\text{N}]\text{PbI}_3$ , and the simulated PXRD pattern was obtained from single crystal diffraction data of  $[\text{Bu}_4\text{N}]\text{PbI}_3$ .

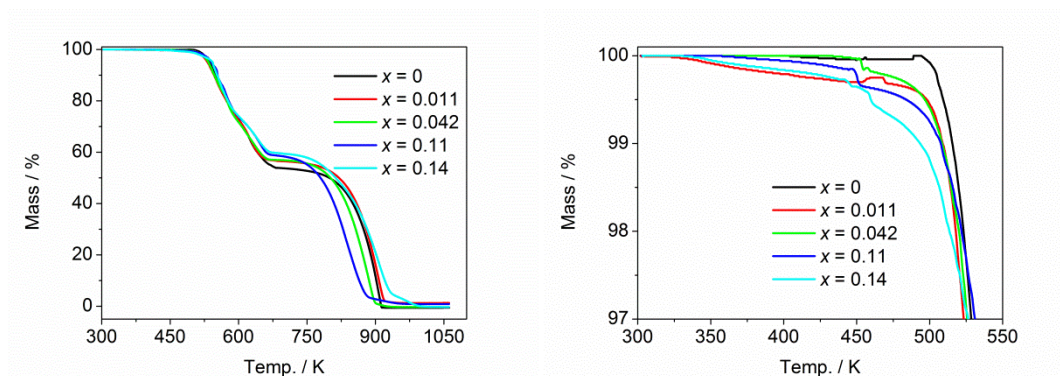

Fig. S8: TG plots of  $\text{Bu}_4\text{N}_{1-x}\text{Li}_x\text{Mn}_x\text{Pb}_{1-x}\text{I}_3$  ( $x = 0-0.14$ ).

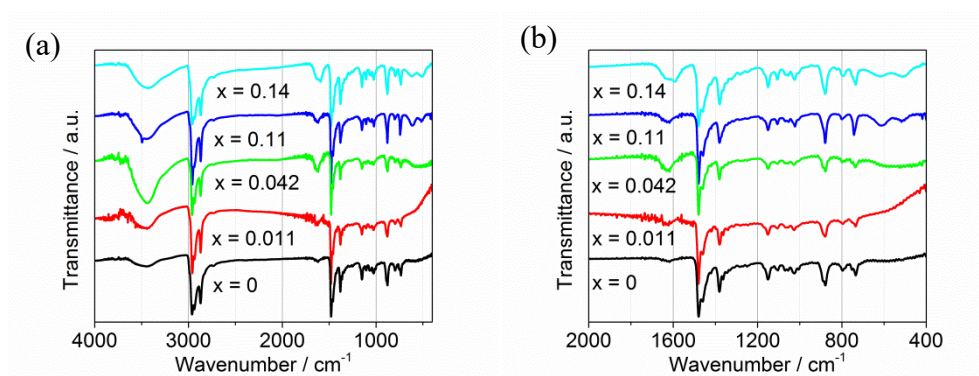

Fig. S9: IR spectra of  $\text{Bu}_4\text{N}_{1-x}\text{Li}_x\text{Mn}_x\text{Pb}_{1-x}\text{I}_3$  ( $x = 0-0.14$ ).

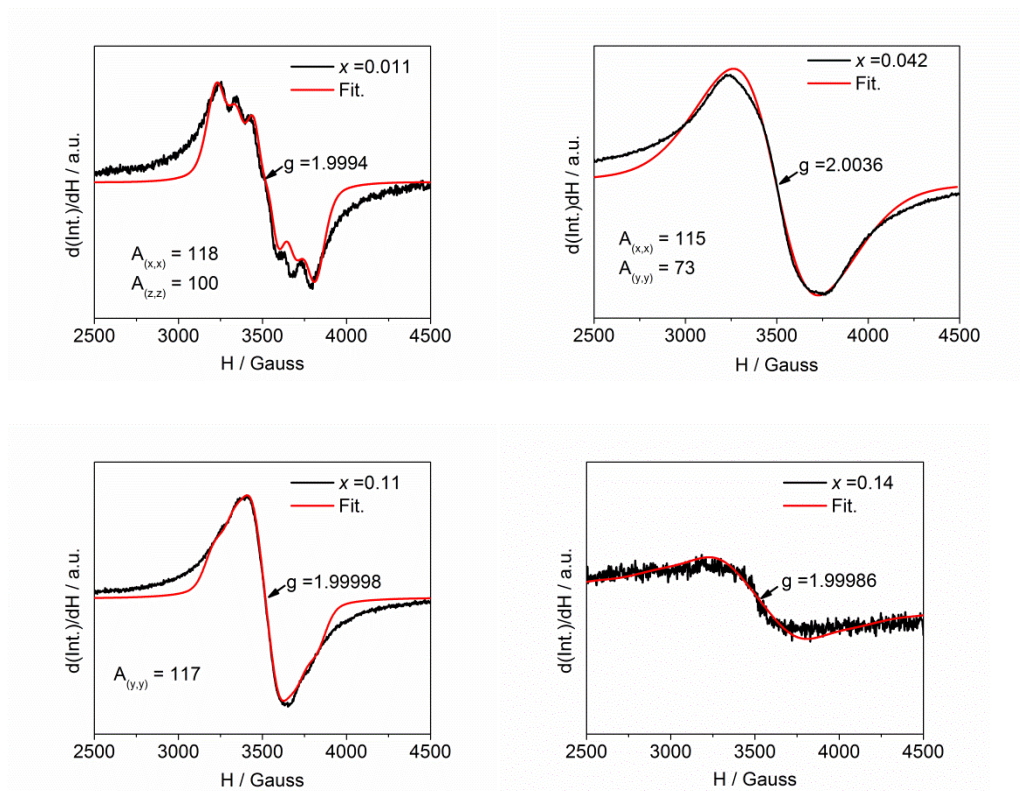

Fig. S10: Experimental and simulated EPR spectra of  $\text{Bu}_4\text{N}_{1-x}\text{Li}_x\text{Mn}_x\text{Pb}_{1-x}\text{I}_3$  ( $x = 0.011\text{--}0.14$ ) with  $g$  value  $\approx 2.0$  and average  $A$  value  $\sim 110$  Gauss.



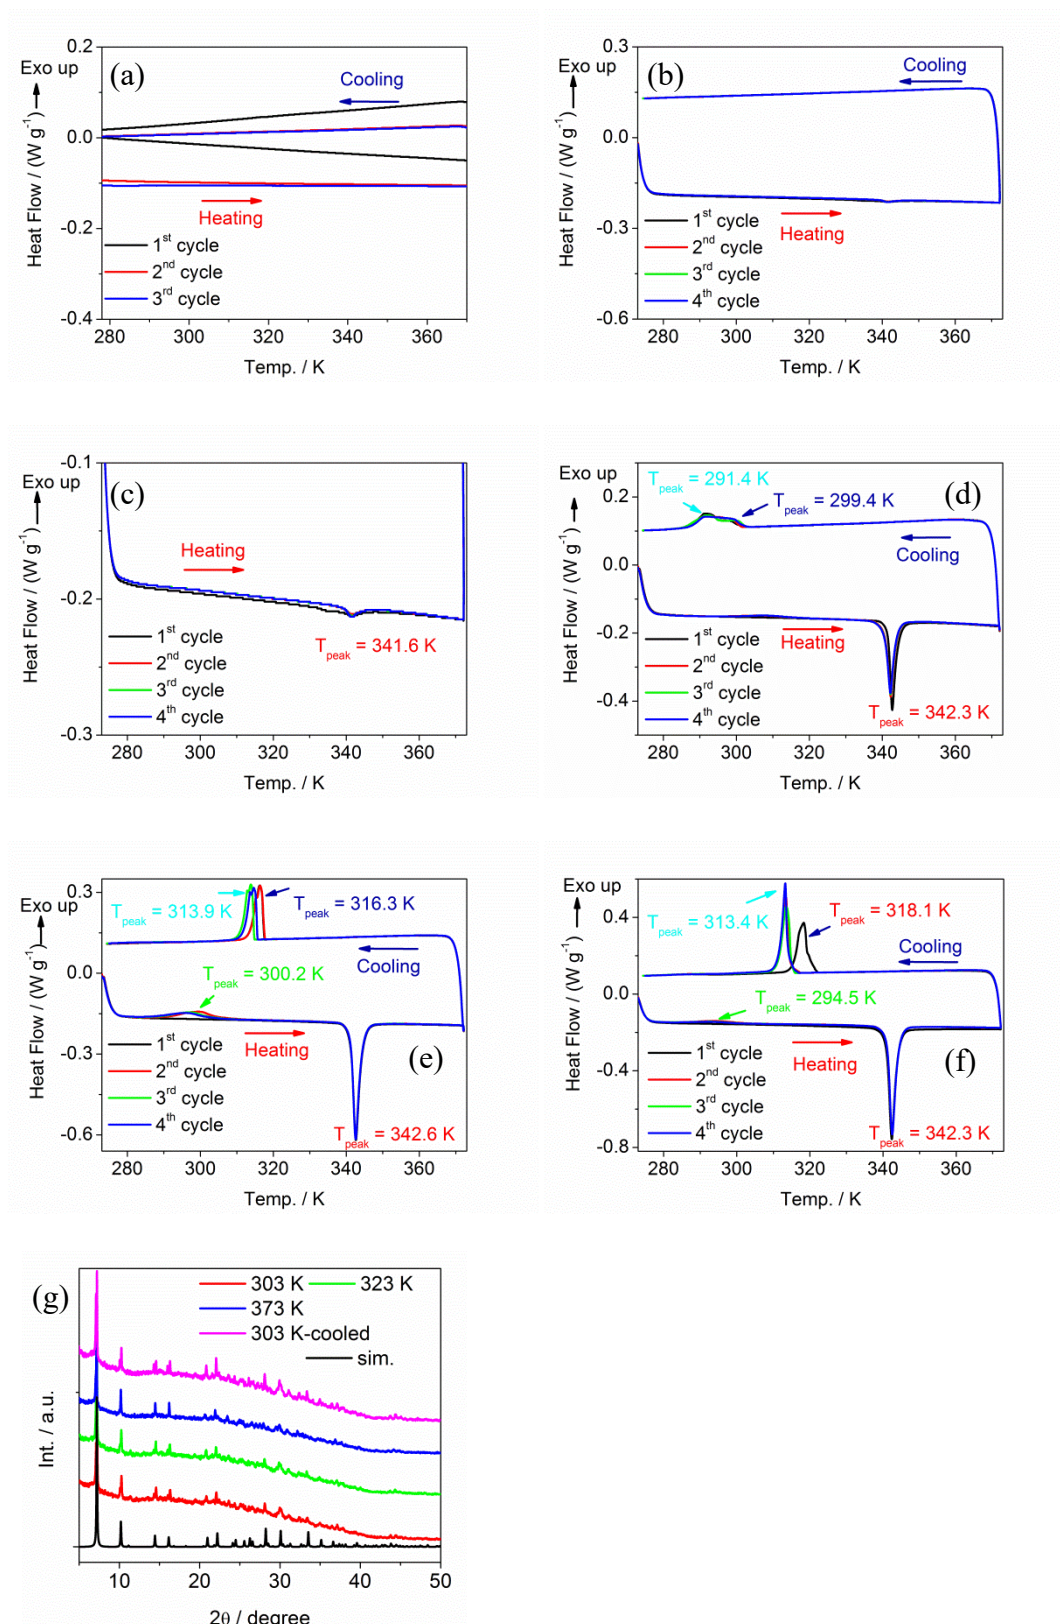

Fig. S11: DSC Plots of with  $x =$  (a) 0, (b, c) 0.011, (d) 0.042, (e) 0.11, (f) 0.14 with four heating and cooling cycles. (g) Variable-temperature PXRD patterns of  $\text{Bu}_4\text{N}_{1-x}\text{Li}_x\text{Mn}_x\text{Pb}_{1-x}\text{I}_3$  with  $x = 0.14$ .

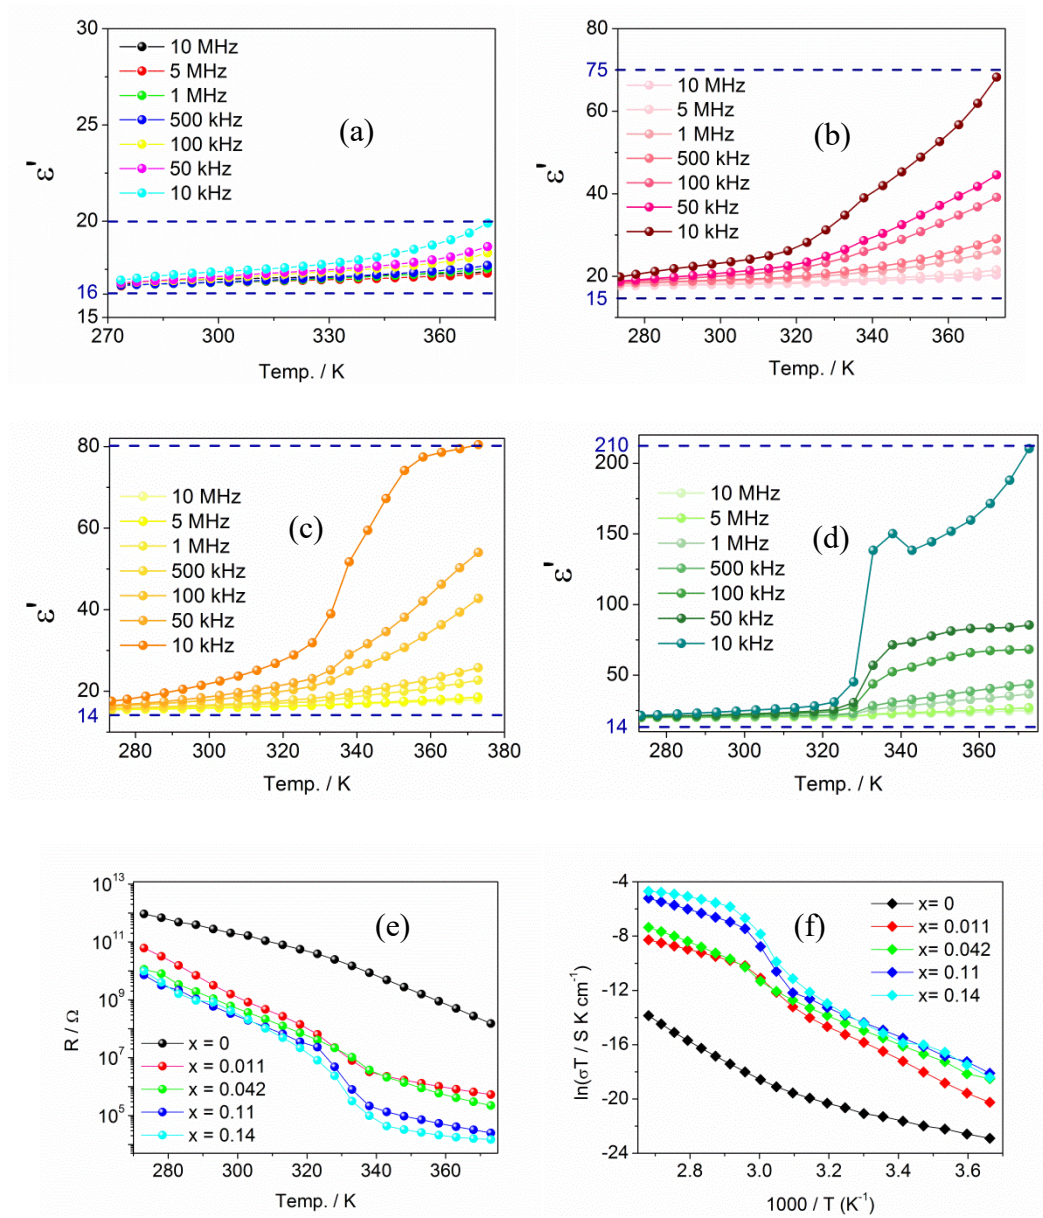

Fig. S12: Plots of dielectric permittivity *versus* temperature at the selected frequencies for  $\text{Bu}_4\text{N}_{1-x}\text{Li}_x\text{Mn}_x\text{Pb}_{1-x}\text{I}_3$  with  $x =$  (a) 0, (b) 0.011, (c) 0.042 and (d) 0.11. (e) Resistance plots and (f) Arrhenius plots of  $\text{Bu}_4\text{N}_{1-x}\text{Li}_x\text{Mn}_x\text{Pb}_{1-x}\text{I}_3$  ( $x = 0$ –0.14) at 273–373K.

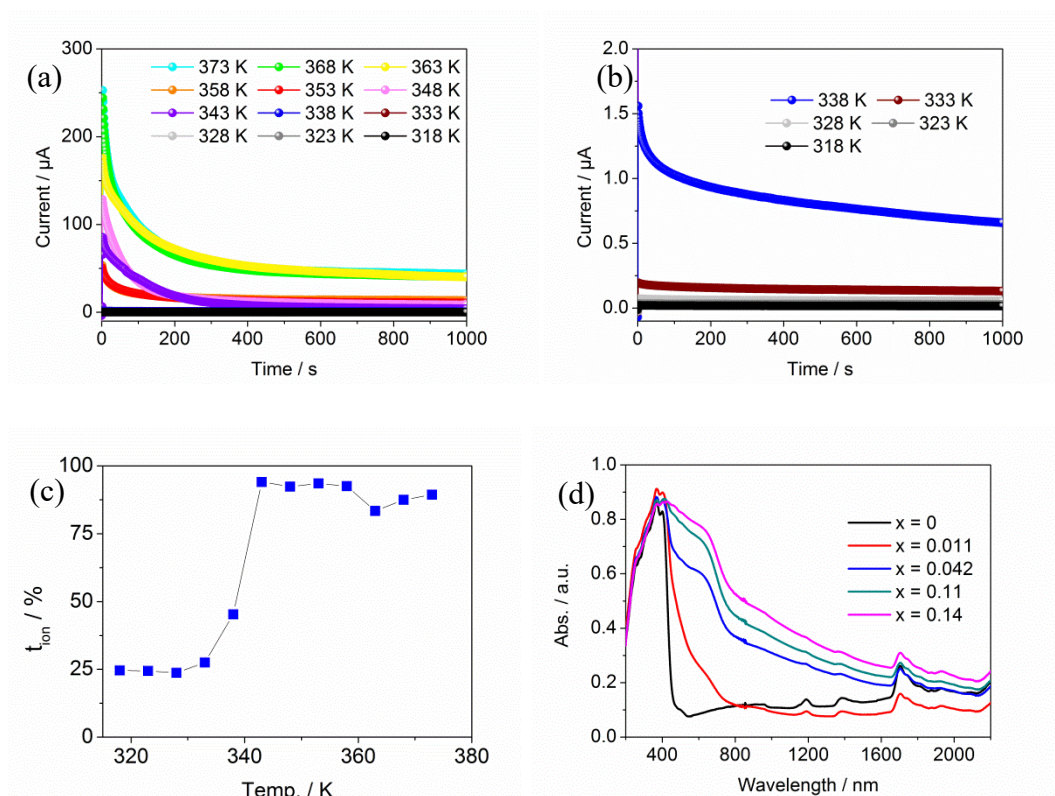

Fig. S13: Plots of (a, b) chronoamperometry of  $\text{Bu}_4\text{N}_{1-x}\text{Li}_x\text{Mn}_x\text{Pb}_{1-x}\text{I}_3$  with  $x = 0\text{--}0.14$ .  
 (c) Transference numbers of ion vs. temperature for  $\text{Bu}_4\text{N}_{1-x}\text{Li}_x\text{Mn}_x\text{Pb}_{1-x}\text{I}_3$  with  $x = 0.14$ .  
 (d) solid ultraviolet-visible near-IR spectra of  $\text{Bu}_4\text{N}_{1-x}\text{Li}_x\text{Mn}_x\text{Pb}_{1-x}\text{I}_3$  with  $x = 0\text{--}0.14$ .



## References

1. Y. J. She, S. P. Zhao, Z. F. Tian, X. M. Ren, *Inorg. Chem. Commun.* 2014, **46**, 29–32.
2. P. T. Zhang, K. Gaurav, H. Kengo, P. S. Shyam, T. L. Ma, H. Shuzi, *ACS Sustain. Chem. Eng.* 2018, **6**, 10221–10228.
3. S. G. Liu, P.J. Wu, Y. Q. Liu, D. B. Zhu, *Mol. Cryst. Liq. Cryst.*, 1997, **86**, 2265–2266.
4. A. Daniel, S. Sadasivan, A. A. David, A. A. Jouse, K. Bindu, *Sol. Energy*. 2019, **187**, 427–437.
